# Supplementary material for: Preparation and Characterization of Shell-Based CaO Catalysts for Ultrasonication-Assisted Production of Biodiesel to Reduce Toxicants in Diesel Generator Emissions
Source: MDPI journal article supplement (doi:10.3390/en16145408), 2023-07-16
Supplement: s1 [file s1]

Table S1. XRF Determination of Elemental Composition for Uncalcined and Calcined Shells

| Element | Uncalcined mussel (ppm) | Calcined mussel (ppm) | Uncalcined oyster (ppm) | Calcined oyster (ppm) | Uncalcined eggshell (ppm) | Calcined eggshell (ppm) | Uncalcined lobster shell (ppm) | Calcined lobster shell (ppm) |
|---------|-------------------------|-----------------------|-------------------------|-----------------------|---------------------------|-------------------------|--------------------------------|------------------------------|
| Mo      |                         | 15.4±9.29             | 7.56±2.2                | 18±11.96              |                           |                         | 11.48±0.57                     | 29.59±4.81                   |
| Sr      | 1111±0.4                | 1818±0.37             | 792.95±1.6              | 1257.6±0.6            | 196±0.79                  | 342.5±0.95              | 1997±0.29                      | 4888.6±0.6                   |
| Rb      |                         |                       |                         |                       |                           |                         | 69.94±1.39                     |                              |
| Pb      |                         |                       |                         | 8.25±8.2              |                           |                         | 6.76±12.09                     | 11.93±14.3                   |
| Zn      |                         |                       | 21±8.37                 | 46.49±10.6            |                           | 16.91±12.3              | 24.31±0.62                     | 53.32±13.11                  |
| W       |                         | 91.8±18.4             | 119.9±38.7              | 136.7±17.9            |                           | 99.5±18.55              |                                | 154.2±17.4                   |
| Cu      |                         | 868.8±0.8             | 35.8±4.39               | 82.49±1.97            |                           |                         |                                | 116.9±8.12                   |
| Fe      | 1735.3±3.6              | 3709±1.4              | 435±12.4                | 908.6±3               | 128±9.9                   | 214.49±4.4              | 55.52±9.23                     | 455.3±3.68                   |
| Cr      | 5.91±1.32               | 11.14±0.4             | 28.8±15.3               |                       |                           | 25.04±21.2              | 40.58±6.7                      | 81.26±11.9                   |
| V       | 118.7±5.9               | 108.3±20.3            | 35.07±27.5              | 157.2±8.6             | 103±13.9                  | 86.08±16.8              |                                |                              |
| Sc      | 4854.4±0.3              | 2631.4±0.4            | 4573.3±0.7              | 2483.4±0.6            | 4930±0.2                  | 2514.1±0.6              | 6123.9±0.1                     | 2512±1.29                    |
| Ca (%)  | 45.52±0.3               | 69.78±0.2             | 48.98±0.8               | 71.99±0.2             | 45.10±0.3                 | 71.89±0.2               | 31.57±0.2                      | 71.34±0.4                    |
| K       | 421.6±4                 | 664.55±3.6            | 610.61±4.6              | 1208.4±2              | 710±4.9                   | 665.03±3.1              | 1609.2±2.3                     | 254±8.14                     |
| Sn      | 1231±1.3                | 2320.4±0.4            |                         | 102.2±6.3             |                           |                         |                                |                              |
| Nb      |                         | 8.25±5.7              |                         |                       |                           |                         | 7.16±7.11                      | 13.9±4.6                     |
| Bi      |                         |                       |                         |                       |                           |                         | 43.09±8.66                     | 19.8±7.6                     |
| Ti      |                         |                       |                         |                       |                           |                         | 92.12±43.45                    | 1115±9.2                     |

Table S2: The American Mineralogist Crystallography Database information for the XRD patterns of oxides in the calcined materials

## Lime

Fiquet G, Richet P, Montagnac G  
 Physics and Chemistry of Minerals 27 (1999) 103-111  
 High-temperature thermal expansion of lime, periclase,  
 corundum and spinel  
 Sample: PtRh10% heating wire, T = 298 K  
 database\_code\_amcsd 0008276  
 CELL PARAMETERS: 4.8150 4.8150 4.8150 90.000 90.000

90.000

```

SPACE GROUP: Fm3m
X-RAY WAVELENGTH:      1.541838
Cell Volume:      111.632
Density (g/cm3):      3.336
MAX. ABS. INTENSITY / VOLUME**2:      44.70567536
RIR:      4.363

```

RIR based on corundum from Acta Crystallographica A38 (1982) 733-739

## Multiplicity

|       |        |        |   |   |   |    |
|-------|--------|--------|---|---|---|----|
| 32.20 | 38.32  | 2.7799 | 1 | 1 | 1 | 8  |
| 37.35 | 100.00 | 2.4075 | 2 | 0 | 0 | 6  |
| 53.85 | 52.90  | 1.7024 | 2 | 2 | 0 | 12 |
| 64.15 | 12.45  | 1.4518 | 3 | 1 | 1 | 24 |
| 67.37 | 14.25  | 1.3900 | 2 | 2 | 2 | 8  |
| 79.65 | 5.57   | 1.2038 | 4 | 0 | 0 | 6  |
| 88.52 | 4.27   | 1.1046 | 3 | 3 | 1 | 24 |

For reference, see Downs et al. (1993) *American Mineralogist* 78, 1104-1107.

## SrO

Wyckoff R W G  
Crystal Structures 1 (1963) 85-237  
Second edition. Interscience Publishers, New York, New York  
rocksalt structure  
database code amcsd 0011405

CELL PARAMETERS: 5.1602 5.1602 5.1602 90.000 90.000 90.000

SPACE GROUP:  $Fm\bar{3}m$

X-RAY WAVELENGTH: 1.541838

Cell Volume: 137.404

Density (g/cm<sup>3</sup>): 5.008

MAX. ABS. INTENSITY / VOLUME\*\*2: 116.3840893

RIR: 7.567

RIR based on corundum from Acta Crystallographica A38 (1982) 733-739

| 2-THETA | INTENSITY | D-SPACING | H | K | L | Multiplicity |
|---------|-----------|-----------|---|---|---|--------------|
| 29.99   | 91.42     | 2.9792    | 1 | 1 | 1 | 8            |
| 34.77   | 100.00    | 2.5801    | 2 | 0 | 0 | 6            |
| 49.99   | 60.49     | 1.8244    | 2 | 2 | 0 | 12           |
| 59.40   | 33.58     | 1.5559    | 3 | 1 | 1 | 24           |
| 62.33   | 17.82     | 1.4896    | 2 | 2 | 2 | 8            |
| 73.39   | 7.24      | 1.2901    | 4 | 0 | 0 | 6            |
| 81.27   | 11.48     | 1.1838    | 3 | 3 | 1 | 24           |
| 83.84   | 18.31     | 1.1539    | 4 | 2 | 0 | 24           |

For reference, see Downs et al. (1993) American Mineral

## K2O

Wyckoff R W G

Crystal Structures 1 (1963) 239-444

Second edition. Interscience Publishers, New York, New York

Anti-fluorite structure

\_database\_code\_amcsd 0011734

CELL PARAMETERS: 6.4360 6.4360 6.4360 90.000 90.000 90.000

SPACE GROUP: Fm3m

X-RAY WAVELENGTH: 1.541838

Cell Volume: 266.593

Density (g/cm3): 2.347

MAX. ABS. INTENSITY / VOLUME\*\*2: 34.64344472

RIR: 4.807

RIR based on corundum from Acta Crystallographica A38 (1982) 733-739

| 2-THETA | INTENSITY | D-SPACING | H | K | L | Multiplicity |
|---------|-----------|-----------|---|---|---|--------------|
| 23.95   | 9.88      | 3.7158    | 1 | 1 | 1 | 8            |
| 27.72   | 65.23     | 3.2180    | 2 | 0 | 0 | 6            |
| 39.61   | 100.00    | 2.2755    | 2 | 2 | 0 | 12           |
| 46.82   | 3.05      | 1.9405    | 3 | 1 | 1 | 24           |
| 49.03   | 13.52     | 1.8579    | 2 | 2 | 2 | 8            |
| 57.26   | 12.27     | 1.6090    | 4 | 0 | 0 | 6            |
| 64.78   | 13.86     | 1.4391    | 4 | 2 | 0 | 24           |
| 71.86   | 19.48     | 1.3137    | 4 | 2 | 2 | 24           |
| 85.31   | 5.22      | 1.1377    | 4 | 4 | 0 | 12           |

=====

XPOW Copyright 1993 Bob Downs, Ranjini Swaminathan and Kurt Bartelmehs  
For reference, see Downs et al. (1993) American Mineralogist 78, 1104-1107.

.....

## K2 O

Zintl E, Harder A, Dauth B

Zeitschrift fur Elektrochemie 40 (1934) 588-593

Gitterstruktur der Oxide, Sulfide, Selenide und Telluride des Lithiums,  
Natriums und Kaliums

\_cod\_database\_code 1010878

\_database\_code\_amcsd 0017549

CELL PARAMETERS: 6.4360 6.4360 6.4360 90.000 90.000 90.000

SPACE GROUP: Fm3m

X-RAY WAVELENGTH: 1.541838

Cell Volume: 266.593

Density (g/cm3): 2.347

MAX. ABS. INTENSITY / VOLUME\*\*2: 34.64344472

RIR: 4.807

RIR based on corundum from Acta Crystallographica A38 (1982) 733-739

| 2-THETA | INTENSITY | D-SPACING | H | K | L | Multiplicity |
|---------|-----------|-----------|---|---|---|--------------|
| 23.95   | 9.88      | 3.7158    | 1 | 1 | 1 | 8            |
| 27.72   | 65.23     | 3.2180    | 2 | 0 | 0 | 6            |
| 39.61   | 100.00    | 2.2755    | 2 | 2 | 0 | 12           |
| 46.82   | 3.05      | 1.9405    | 3 | 1 | 1 | 24           |
| 49.03   | 13.52     | 1.8579    | 2 | 2 | 2 | 8            |
| 57.26   | 12.27     | 1.6090    | 4 | 0 | 0 | 6            |
| 64.78   | 13.86     | 1.4391    | 4 | 2 | 0 | 24           |
| 71.86   | 19.48     | 1.3137    | 4 | 2 | 2 | 24           |
| 85.31   | 5.22      | 1.1377    | 4 | 4 | 0 | 12           |

=====

XPOW Copyright 1993 Bob Downs, Ranjini Swaminathan and Kurt Bartelmehs  
For reference, see Downs et al. (1993) American Mineralogist 78, 1104-1107.

# Periclase/MgO

Hazen R M

American Mineralogist 61 (1976) 266-271

Effects of temperature and pressure on the cell dimension and X-ray

temperature

factors of periclase

T = 24 C, P = 1 atm, standard mount

\_database\_code\_amcsd 0000501

CELL PARAMETERS: 4.2110 4.2110 4.2110 90.000 90.000 90.000

SPACE GROUP: Fm3m

X-RAY WAVELENGTH: 1.541838

Cell Volume: 74.672

Density (g/cm3): 3.585

MAX. ABS. INTENSITY / VOLUME\*\*2: 35.75123052

RIR: 3.247

RIR based on corundum from Acta Crystallographica A38 (1982) 733-739

| 2-THETA | INTENSITY | D-SPACING | H | K | L | Multiplicity |
|---------|-----------|-----------|---|---|---|--------------|
| 36.97   | 10.52     | 2.4312    | 1 | 1 | 1 | 8            |
| 42.96   | 100.00    | 2.1055    | 2 | 0 | 0 | 6            |
| 62.37   | 53.43     | 1.4888    | 2 | 2 | 0 | 12           |
| 74.77   | 6.56      | 1.2697    | 3 | 1 | 1 | 24           |
| 78.72   | 15.30     | 1.2156    | 2 | 2 | 2 | 8            |

=====

XPOW Copyright 1993 Bob Downs, Ranjini Swaminathan and Kurt Bartelmehs  
For reference, see Downs et al. (1993) American Mineralogist 78, 1104-1107.

# Na2O

Wyckoff R W G

Crystal Structures 1 (1963) 239-444

Second edition. Interscience Publishers, New York, New York

Anti-fluorite structure

\_database\_code\_amcsd 0011742

CELL PARAMETERS: 5.5500 5.5500 5.5500 90.000 90.000 90.000

SPACE GROUP: Fm3m

X-RAY WAVELENGTH: 1.541838

Cell Volume: 170.954

Density (g/cm3): 2.408

MAX. ABS. INTENSITY / VOLUME\*\*2: 22.51046947

RIR: 3.044

RIR based on corundum from Acta Crystallographica A38 (1982) 733-739

| 2-THETA | INTENSITY | D-SPACING | H | K | L | Multiplicity |
|---------|-----------|-----------|---|---|---|--------------|
| 27.84   | 23.86     | 3.2043    | 1 | 1 | 1 | 8            |
| 32.26   | 38.15     | 2.7750    | 2 | 0 | 0 | 6            |
| 46.27   | 100.00    | 1.9622    | 2 | 2 | 0 | 12           |
| 54.86   | 5.82      | 1.6734    | 3 | 1 | 1 | 24           |
| 57.52   | 7.94      | 1.6021    | 2 | 2 | 2 | 8            |
| 67.51   | 10.77     | 1.3875    | 4 | 0 | 0 | 6            |
| 74.53   | 1.48      | 1.2733    | 3 | 3 | 1 | 24           |
| 76.81   | 7.26      | 1.2410    | 4 | 2 | 0 | 24           |
| 85.76   | 15.93     | 1.1329    | 4 | 2 | 2 | 24           |

=====

XPOW Copyright 1993 Bob Downs, Ranjini Swaminathan and Kurt Bartelmehs  
For reference, see Downs et al. (1993) American Mineralogist 78, 1104-1107.

Portlandite/Ca(OH)2

Henderson D M, Gutowsky H S

American Mineralogist 47 (1962) 1231-1251

A nuclear magnetic resonance determination of the hydrogen positions in  
Ca(OH)2

T = -190 C

\_database\_code\_amcsd 0000116

CELL PARAMETERS: 3.5850 3.5850 4.8710 90.000 90.000 120.000

SPACE GROUP: P-3m1

X-RAY WAVELENGTH: 1.541838

Cell Volume: 54.216

Density (g/cm3): 2.269

MAX. ABS. INTENSITY / VOLUME\*\*2: 23.80613776

RIR: 3.416

RIR based on corundum from Acta Crystallographica A38 (1982) 733-739

| 2-THETA | INTENSITY | D-SPACING | H | K | L | Multiplicity |
|---------|-----------|-----------|---|---|---|--------------|
| 18.21   | 63.98     | 4.8710    | 0 | 0 | 1 | 2            |
| 28.75   | 16.97     | 3.1047    | 1 | 0 | 0 | 6            |
| 34.25   | 2.54      | 2.6181    | 1 | 0 | 1 | 6            |
| 34.25   | 97.46     | 2.6181    | 0 | 1 | 1 | 6            |
| 47.44   | 17.52     | 1.9162    | 1 | 0 | 2 | 6            |
| 47.44   | 23.93     | 1.9162    | 0 | 1 | 2 | 6            |
| 50.95   | 27.79     | 1.7925    | 1 | 1 | 0 | 6            |
| 54.55   | 14.51     | 1.6822    | 1 | 1 | 1 | 12           |
| 56.69   | 1.12      | 1.6237    | 0 | 0 | 3 | 2            |
| 59.55   | 1.91      | 1.5524    | 2 | 0 | 0 | 6            |
| 62.83   | 9.84      | 1.4791    | 2 | 0 | 1 | 6            |
| 64.80   | 1.16      | 1.4388    | 0 | 1 | 3 | 6            |
| 64.80   | 9.40      | 1.4388    | 1 | 0 | 3 | 6            |
| 72.16   | 4.56      | 1.3091    | 2 | 0 | 2 | 6            |
| 72.16   | 3.33      | 1.3091    | 0 | 2 | 2 | 6            |
| 78.55   | 1.40      | 1.2177    | 0 | 0 | 4 | 2            |
| 79.68   | 1.96      | 1.2034    | 1 | 1 | 3 | 12           |
| 85.03   | 1.99      | 1.1408    | 1 | 2 | 1 | 12           |
| 85.69   | 1.15      | 1.1337    | 1 | 0 | 4 | 6            |
| 86.80   | 3.08      | 1.1220    | 0 | 2 | 3 | 6            |

=====

XPOW Copyright 1993 Bob Downs, Ranjini Swaminathan and Kurt Bartelmehs  
For reference, see Downs et al. (1993) American Mineralogist 78, 1104-1107.

Portlandite/Ca(OH)2

Desgranges L, Grebille D, Calvarin g, Chevrier G, Floquet N, Niepce J

Acta Crystallographica B49 (1993) 812-817

Hydrogen thermal motion in calcium hydroxide: Ca (O H)2

\_cod\_database\_code 1001768

\_database\_code\_amcsd 0009874

CELL PARAMETERS: 3.5890 3.5890 4.9110 90.000 90.000 120.000

SPACE GROUP: P-3m1

X-RAY WAVELENGTH: 1.541838

Cell Volume: 54.783

Density (g/cm3): 2.246

MAX. ABS. INTENSITY / VOLUME\*\*2: 24.52345437

RIR: 3.556

RIR based on corundum from Acta Crystallographica A38 (1982) 733-739

| 2-THETA | INTENSITY | D-SPACING | H | K | L | Multiplicity |
|---------|-----------|-----------|---|---|---|--------------|
|---------|-----------|-----------|---|---|---|--------------|

|       |       |        |   |   |   |    |
|-------|-------|--------|---|---|---|----|
| 18.06 | 63.14 | 4.9110 | 0 | 0 | 1 | 2  |
| 28.72 | 17.21 | 3.1082 | 1 | 0 | 0 | 6  |
| 34.14 | 97.31 | 2.6264 | 1 | 0 | 1 | 6  |
| 34.14 | 2.69  | 2.6264 | 0 | 1 | 1 | 6  |
| 47.17 | 25.16 | 1.9268 | 1 | 0 | 2 | 6  |
| 47.17 | 18.80 | 1.9268 | 0 | 1 | 2 | 6  |
| 50.88 | 28.52 | 1.7945 | 1 | 1 | 0 | 6  |
| 54.44 | 15.85 | 1.6855 | 1 | 1 | 1 | 12 |
| 56.19 | 1.35  | 1.6370 | 0 | 0 | 3 | 2  |
| 59.48 | 2.23  | 1.5541 | 2 | 0 | 0 | 6  |
| 62.71 | 10.64 | 1.4817 | 0 | 2 | 1 | 6  |
| 64.29 | 1.12  | 1.4488 | 1 | 1 | 2 | 12 |
| 64.32 | 1.36  | 1.4484 | 1 | 0 | 3 | 6  |
| 64.32 | 10.47 | 1.4484 | 0 | 1 | 3 | 6  |
| 71.90 | 3.89  | 1.3132 | 2 | 0 | 2 | 6  |
| 71.90 | 5.23  | 1.3132 | 0 | 2 | 2 | 6  |
| 77.79 | 1.66  | 1.2277 | 0 | 0 | 4 | 2  |
| 79.20 | 2.59  | 1.2094 | 1 | 1 | 3 | 12 |
| 84.87 | 2.35  | 1.1425 | 2 | 1 | 1 | 12 |
| 84.93 | 1.42  | 1.1419 | 0 | 1 | 4 | 6  |
| 86.31 | 3.70  | 1.1271 | 2 | 0 | 3 | 6  |

=====

XPOW Copyright 1993 Bob Downs, Ranjini Swaminathan and Kurt Bartelmehs  
 For reference, see Downs et al. (1993) American Mineralogist 78, 1104-1107.

.....  
**Zincite/ZnO**

Kihara K, Donnay G

The Canadian Mineralogist 23 (1985) 647-654

Anharmonic thermal vibrations in ZnO

Model: 2-c, at T = 293 K

\_database\_code\_amcsd 0005203

CELL PARAMETERS: 3.2494 3.2494 5.2038 90.000 90.000 120.000

SPACE GROUP: P6<sub>3</sub>mc

X-RAY WAVELENGTH: 1.541838

Cell Volume: 47.584

Density (g/cm3): 5.681

MAX. ABS. INTENSITY / VOLUME\*\*2: 108.5150060

RIR: 6.220

RIR based on corundum from Acta Crystallographica A38 (1982) 733-739

| 2-THETA | INTENSITY | D-SPACING | H | K | L | Multiplicity |
|---------|-----------|-----------|---|---|---|--------------|
| 31.80   | 52.55     | 2.8141    | 1 | 0 | 0 | 6            |
| 34.47   | 39.77     | 2.6019    | 0 | 0 | 2 | 1            |
| 36.29   | 100.00    | 2.4753    | 1 | 0 | 1 | 6            |
| 47.60   | 21.60     | 1.9104    | 1 | 0 | 2 | 6            |
| 56.65   | 31.17     | 1.6247    | 1 | 1 | 0 | 6            |
| 62.94   | 28.09     | 1.4766    | 1 | 0 | 3 | 6            |
| 66.45   | 4.24      | 1.4070    | 2 | 0 | 0 | 6            |
| 68.03   | 23.70     | 1.3781    | 1 | 1 | 2 | 6            |
| 69.16   | 12.05     | 1.3583    | 2 | 0 | 1 | 6            |
| 72.68   | 1.99      | 1.3010    | 0 | 0 | 4 | 1            |
| 77.05   | 3.74      | 1.2377    | 2 | 0 | 2 | 6            |
| 81.51   | 2.02      | 1.1809    | 1 | 0 | 4 | 6            |
| 89.74   | 7.92      | 1.0927    | 2 | 0 | 3 | 6            |

=====

XPOW Copyright 1993 Bob Downs, Ranjini Swaminathan and Kurt Bartelmehs  
 For reference, see Downs et al. (1993) American Mineralogist 78, 1104-1107.

### Zincite/ZnO

Aminoff G/Zeitschrift fur Kristallographie 56 (1921) 495-505

Ueber Lauephotogramme und Struktur von Zinkit.

\_cod\_database\_code 1011258

\_database\_code\_amcsd 0018119

CELL PARAMETERS: 3.2200 3.2200 5.2000 90.000 90.000 120.000

SPACE GROUP: P6<sub>3</sub>mc

X-RAY WAVELENGTH: 1.541838

Cell Volume: 46.692

Density (g/cm<sup>3</sup>): 5.789

MAX. ABS. INTENSITY / VOLUME\*\*2: 116.7488557

RIR: 6.566

RIR based on corundum from Acta Crystallographica A38 (1982) 733-739

| 2-THETA | INTENSITY | D-SPACING | H | K | L | Multiplicity |
|---------|-----------|-----------|---|---|---|--------------|
| 32.10   | 50.47     | 2.7886    | 1 | 0 | 0 | 6            |
| 34.50   | 37.91     | 2.6000    | 0 | 0 | 2 | 1            |
| 36.56   | 100.00    | 2.4575    | 1 | 0 | 1 | 6            |
| 47.83   | 20.89     | 1.9017    | 1 | 0 | 2 | 6            |
| 57.22   | 31.02     | 1.6100    | 1 | 1 | 0 | 6            |
| 63.16   | 29.96     | 1.4721    | 1 | 0 | 3 | 6            |
| 67.13   | 4.31      | 1.3943    | 2 | 0 | 0 | 6            |
| 68.56   | 23.92     | 1.3688    | 1 | 1 | 2 | 6            |
| 69.84   | 12.85     | 1.3467    | 2 | 0 | 1 | 6            |
| 72.74   | 2.18      | 1.3000    | 0 | 0 | 4 | 1            |
| 77.72   | 3.87      | 1.2288    | 2 | 0 | 2 | 6            |
| 81.73   | 2.27      | 1.1783    | 1 | 0 | 4 | 6            |

For reference, see Downs et al. (1993) American Mineralogist 78, 1104-1107.

### Zincite/ZnO

Wyckoff R W G/Crystal Structures 1 (1963) 85-237

Second edition. Interscience Publishers, New York, New York

Note: wurtzite structure

\_database\_code\_amcsd 0011555

CELL PARAMETERS: 3.2495 3.2495 5.2069 90.000 90.000 120.000

SPACE GROUP: P6<sub>3</sub>mc

X-RAY WAVELENGTH: 1.541838

Cell Volume: 47.615

Density (g/cm<sup>3</sup>): 5.677

MAX. ABS. INTENSITY / VOLUME\*\*2: 125.0959236

RIR: 7.175

RIR based on corundum from Acta Crystallographica A38 (1982) 733-739

| 2-THETA | INTENSITY | D-SPACING | H | K | L | Multiplicity |
|---------|-----------|-----------|---|---|---|--------------|
| 31.80   | 46.52     | 2.8141    | 1 | 0 | 0 | 6            |
| 34.45   | 28.62     | 2.6035    | 0 | 0 | 2 | 1            |
| 36.29   | 100.00    | 2.4757    | 1 | 0 | 1 | 6            |
| 47.58   | 16.31     | 1.9111    | 1 | 0 | 2 | 6            |
| 56.65   | 28.86     | 1.6248    | 1 | 1 | 0 | 6            |
| 62.91   | 29.32     | 1.4773    | 1 | 0 | 3 | 6            |
| 66.44   | 4.02      | 1.4071    | 2 | 0 | 0 | 6            |
| 68.02   | 19.35     | 1.3784    | 1 | 1 | 2 | 6            |
| 69.16   | 12.68     | 1.3584    | 2 | 0 | 1 | 6            |
| 72.63   | 2.22      | 1.3017    | 0 | 0 | 4 | 1            |
| 77.04   | 3.16      | 1.2379    | 2 | 0 | 2 | 6            |
| 81.46   | 2.31      | 1.1815    | 1 | 0 | 4 | 6            |
| 89.71   | 8.77      | 1.0930    | 2 | 0 | 3 | 6            |

For reference, see Downs et al. (1993) American Mineralogist 78, 1104-1107.

Table S3. Percent reduction (PR%) of diesel generator fuel emissions from B20 and B40 relative to ULSPD

|                                  | Retention Time (min) | B20 PR% | B40 PR% |
|----------------------------------|----------------------|---------|---------|
| Propene                          | 4.37                 | 39%     | 35%     |
| 1,3-Butadiene                    | 5.00                 | 38%     | 49%     |
| Acetone                          | 6.18                 | 39%     | 54%     |
| Isopropyl Alcohol                | 6.47                 | 18%     | 18%     |
| Methyl Vinyl Ketone              | 8.53                 | 39%     | 47%     |
| 2-Butanone (Methyl Ethyl Ketone) | 8.87                 | 38%     | 45%     |
| Benzene                          | 11.55                | 28%     | 33%     |
| Toluene                          | 15.76                | 37%     | 44%     |
| Ethylbenzene                     | 19.28                | 28%     | 32%     |
| o-Xylene                         | 20.25                | 26%     | 33%     |
| 1,2,4-Trimethylbenzene           | 22.72                | 19%     | 20%     |
